# Supplementary material for: Tracking the origin of simultaneous endometrial and ovarian cancer by next-generation sequencing – a case report
Source: Springer Nature journal article supplement (doi:10.1186/s12885-017-3054-6), 2017-01-19
Supplement: MOESM2 [file 12008220]

## Supplementary Information:

### Tracking the origin of synchronous endometrial and ovarian cancer by next-generation sequencing – a case report.

Nadejda Valtcheva<sup>1\*</sup>, Franziska M. Lang<sup>2\*</sup>, Aurelia Noske<sup>1</sup>, Eleftherios P. Samartzis<sup>2</sup>, Anna-Maria Schmidt<sup>2</sup>, Elisa Bellini<sup>1</sup>, Daniel Fink<sup>2</sup>, Holger Moch<sup>1</sup>, Markus Rechsteiner<sup>1</sup>, Konstantin J. Dedes<sup>2\*</sup> and Peter J. Wild<sup>1\*</sup>

*<sup>1</sup>Institute of Surgical Pathology, University Hospital Zurich, Zurich, Switzerland*

*<sup>2</sup>Department of Gynaecology, University Hospital Zurich, Zurich, Switzerland*

**Supplementary Figure 1A-F.** Areas used for DNA extraction in the endometrial (A, B) and ovarian (C, D) carcinoma and the lung metastasis (E, F).

**Supplementary Figure 2.** Electropherograms from Sanger sequencing of *ARID1A*, *CTNNB1*, *PIK3CA* and *PTEN*. Arrows show the peaks of the mutated sites.

**Suppl. Table 1.** Sequences of the primers used for Sanger sequencing.

**Suppl. Table 2.** Comprehensive list of variants from targeted re-sequencing of the ovarian cancer, endometrial cancer and lung metastasis.

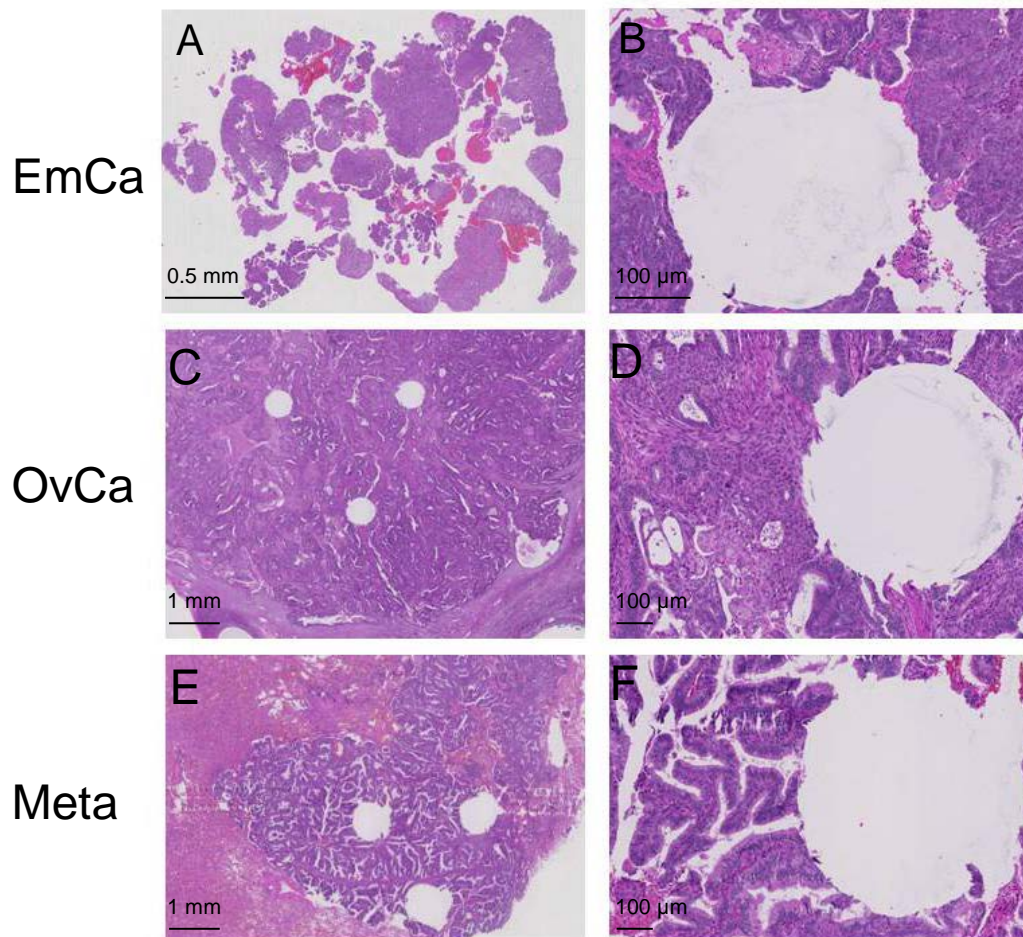

**Suppl. Figure 1A-F. Areas used for DNA extraction in the endometrial (A, B) and ovarian (C, D) carcinoma and the lung metastasis (E, F). The oval gaps in the FFPE tissue correspond to the punches excised from the block and processed for NGS HE staining; EmCa, endometrial carcinoma; OvCa, ovarian carcinoma; Meta, lung metastasis.**

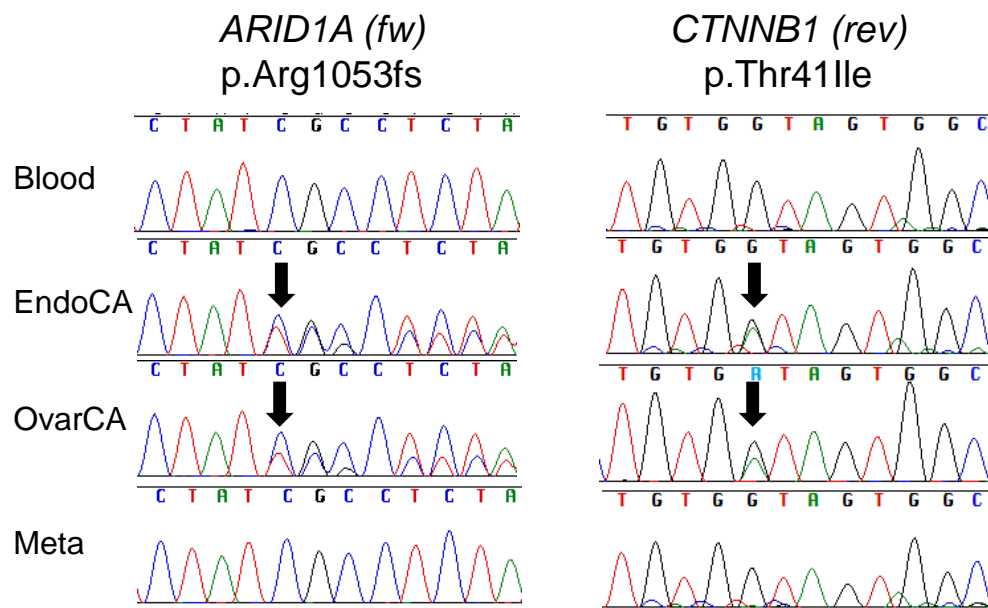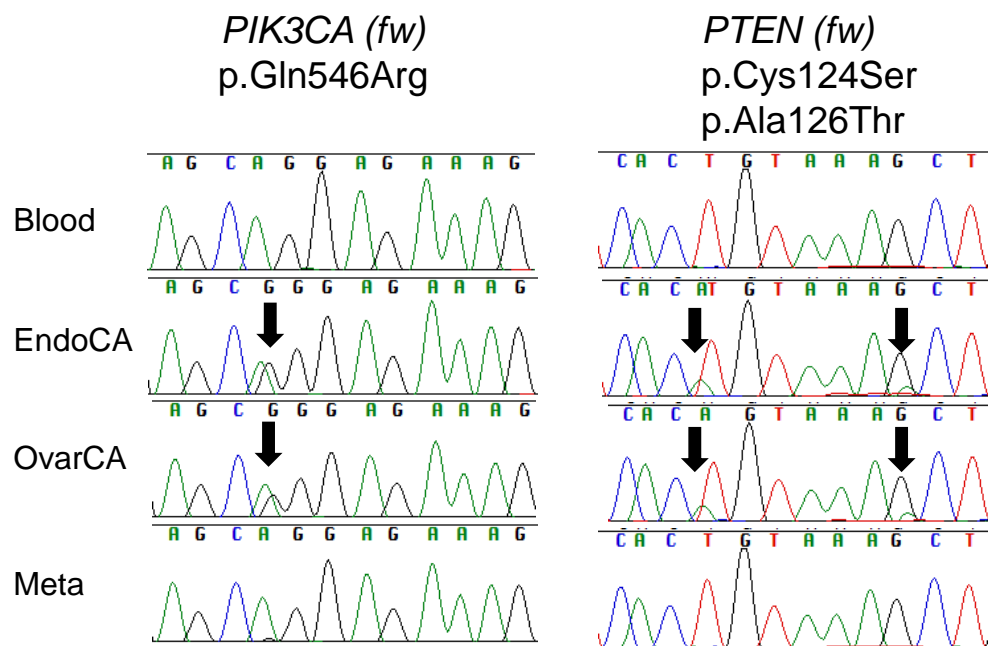

Suppl. Figure 2. Electropherograms from Sanger sequencing of *ARID1A*, *CTNNB1*, *PIK3CA* and *PTEN*. Arrows show the peaks of the mutated sites.

**Suppl. Table 1. Sequences of the primers used for Sanger sequencing.**

| <b>Location</b>   | <b>Gene</b> | <b>Forward primer</b>   | <b>Reverse primer</b>   |
|-------------------|-------------|-------------------------|-------------------------|
| chr1:27094447     | ARID1A      | TTTTGACCTGAACCTTCCAGA   | TCACCTGAGTCAATCCACCA    |
| chr3:12641248     | RAF1        | ATGGGTTGATCCTTTGATGC    | ACACCAAAGCCCTGCAGTTA    |
| chr3:41266125     | CTNNB1      | AAGCGGCTGTTAGTCACTGG    | TCAAACTGCATTCTGACTTTCA  |
| chr3:178936095    | PIK3CA      | CTGTGAATCCAGAGGGGAAA    | TTTAGCACTTACCTGTGACTCCA |
| chr6:152443737    | SYNE1       | GAAGGTGCAGAGGCCAAAAAG   | GGGCACAGCTGTAGTCTTCC    |
| chr7:106524631    | PIK3CG      | TGCTCTCTGAAAATGGTTTCC   | TCACCTGTCTCGGTGATCATA   |
| chr10:89692886/92 | PTEN        | AGACCATAACCCACCACAGC    | TGGTCCTTACTTCCCATAGAA   |
| chr20:40710566    | PTPRT       | AGCCCGTAGTGGAACCTTCT    | TAGCAGCCAGGTGTTGAGTG    |
| chrX:41057832     | USP9X       | TCCCTTTTTCAACTTTTTAGGAA | CCTCACACAGCCAACAGCTA    |

**Suppl. Table 2. Comprehensive list of variants from targeted re-sequencing of blood, ovarian cancer, endometrial cancer and lung metastasis.**
